# Supplementary material
Source: MDPI journal article supplement (https://www.mdpi.com/2071-1050/7/7/9326)
Supplement: s1 [file s1]

## Sheet: SI
Supplementary Material
Table S1. Data used in ecological footprint calculations for Puerto Rico (see footnotes below for data sources and descriptions).
Footnote	Variable name	1969	1970	1971	1972	1973	1974	1975	1976	1977	1978	1979	1980	1981	1982	1983	1984	1985	1986	1987	1988	1989	1990	1991	1992	1993	1994	1995	1996	1997	1998	1999	2000	2001	2002	2003	2004	2005	2006	2007	2008	2009	2010
2	Population (persons)	2684795	2712033	2724086	2772442	2821084	2869455	2917838	2966276	3014705	3063226	3111625	3160022	3202933	3229386	3257127	3286283	3316799	3348804	3382250	3417295	3453916	3492190	3550566	3574772	3600252	3627048	3655194	3684739	3715726	3748150	3782143	3808610	3839810	3858806	3878532	3894855	3912054	3927776	3942375	3954037	3740410	3722133
14a	Coal consumption (kg)	1.69268e+08	1.70642e+08	1.72016e+08	1.7339e+08	1.74763e+08	1.76137e+08	1.77511e+08	1.78884e+08	1.80258e+08	1.81632e+08	1.83005e+08	1.84379e+08	1.85753e+08	1.87126e+08	1.71e+08	1e+08	1e+08	2.32e+08	2.93e+08	3.58e+08	2.98e+08	2.13e+08	1.92e+08	1.54e+08	1.6e+08	1.62e+08	1.65e+08	1.7e+08	1.73e+08	1.75e+08	1.6e+08	1.6e+08	1.55e+08	4.4e+08	1.38e+09	1.3e+09	1.33e+09	1.5e+09	1.5e+09	1.5e+09	1.5e+09	1.5285e+09
14b	Natural Gas Consumption (cubic meters)		0	0	0	0	0	0	0	0	0	0	0	0	0	0	0	0	0	0	0	0	0	0	0	0	0	0	0	0	0	0	3.39802e+08	6.22971e+08	6.22971e+08	7.36238e+08	6.79604e+08	6.79604e+08	707921165	7.36238e+08	7.92872e+08	7.64555e+08	7.64555e+08
14c	Petroleum Consumption (liters)	6.58572e+09	6.62732e+09	6.66892e+09	6.71053e+09	6.75213e+09	6.79373e+09	6.83534e+09	6.87694e+09	6.91854e+09	6.96014e+09	7.00175e+09	8704554383	9.53149e+09	6.91142e+09	6.61546e+09	7.2683e+09	6.29256e+09	6.76861e+09	7.04139e+09	6.41783e+09	6.22698e+09	6.10006e+09	7.64284e+09	6.77128e+09	7.05764e+09	7.19756e+09	7.35852e+09	7.61065e+09	7.80131e+09	7.98817e+09	6.68581e+09	8.76352e+09	9.30796e+09	9.2301e+09	9.47966e+09	9.69526e+09	9.3667e+09	9.17161e+09	7.38361e+09	7.62693e+09	7.14307e+09	6.52842e+09
14d	Nuclear Electric Consumption (MJ)	0	0	0	0	0	0	0	0	0	0	0	0	0	0	0	0	0	0	0	0	0	0	0	0	0	0	0	0	0	0	0	0	0	0	0	0	0	0	0	0	0	0
14e	Hydro-electric Consumption (MJ)	928012680	790488720	896209200	653738184	454695120	350869680	483472440	4.44593e+08	3.3492e+08	3.44862e+08	3.94102e+08	7.66266e+08	4.7012e+08	5.36225e+08	393919200	483105600	7.50103e+08	809865000	534146400	5.33236e+08	5.01468e+08	5.72103e+08	4.23554e+08	4.33356e+08	540340416	334782000	155354400	476460000	5.05541e+08	235761120	5.14965e+08	6.39287e+08	521676000	523258200	309409200	420714720	522690480	5.32677e+08	375917220	4.67388e+08	613191060	4.81287e+08
14f	Wood and waste Consumption (MJ)	0	0	0	0	0	0	0	0	0	0	0	0	0	0	0	0	0	0	0	0	0	0	0	0	0	0	0	0	0	0	0	0	0	0	0	0	0	0	0	0	0	0
15	Land Area (hectares)	886957	886957	886957	886957	886957	886957	886957	886957	886957	886957	886957	886957	886957	886957	886957	886957	886957	886957	886957	886957	886957	886957	886957	886957	886957	886957	886957	886957	886957	886957	886957	886957	886957	886957	886957	886957	886957	886957	886957	886957	886957	886957
16	Population density (individuals per hectare)	3.02697	3.05768	3.07127	3.12579	3.18063	3.23517	3.28972	3.34433	3.39893	3.45364	3.5082	3.56277	3.61115	3.64097	3.67225	3.70512	3.73953	3.77561	3.81332	3.85283	3.89412	3.93727	4.00309	4.03038	4.05911	4.08932	4.12105	4.15436	4.1893	4.22585	4.26418	4.29402	4.3292	4.35061	4.37285	4.39126	4.41065	4.42837	4.44483	4.45798	4.21713	4.19652
	Energy land (ha)
50	Built-up land (ha)	75346.2	76029.4	76712.7	77395.9	78079.2	78762.4	79445.6	80128.9	80812.1	81495.3	82178.6	82861.8	83545.1	84228.3	84911.5	85594.8	86278	86961.3	87644.5	88327.7	89011	89694.2	90640	91397.8	92155.6	92913.3	93671.1	94428.9	95186.7	95944.4	96702.2	97460	96754	96048	95342	96263.4	97184.8	98106.2	100580	103054	105528	108003
17	Arable land (ha)	142518	141726	140933	140141	139349	138556	131805	125055	118304	111553	104187	96821.2	89455.2	82089.1	85154.1	88219.2	91284.3	94349.4	97414.5	95556.8	93699.1	91841.3	89983.6	88125.9	86268.2	84410.5	82552.8	80695.1	78837.4	76979.7	77308.6	77637.5	77966.5	78295.4	71769.5	65243.6	58717.7	52191.7	45665.8	53213.6	51114.5	49015.4
47	Pasture (ha)	134507	136030	137552	139075	140597	142119	137965	133810	129656	125501	141963	158424	174885	191347	185420	179494	173567	167641	161714	157366	153018	148670	144322	139974	135626	131278	126930	122583	118235	113887	102969	92050.6	81132.6	70214.6	72255.1	74295.6	76336.2	78376.7	80417.2	92344.6	90409	88473.4
48	Forest (ha)	154585	171830	189076	206321	223566	240812	258057	275303	292548	287932	283316	278700	282860	287020	291180	295340	299500	312510	325521	338532	351542	364552	377563	378013	378463	378913	379363	379813	380263	380713	381163	381613	422938	464263	505588	453962	461405	468848	476292	483735	491179	498622
49	Sea (ha)	492082	492082	492082	492082	492082	492082	492082	492082	492082	492082	492082	492082	492082	492082	492082	492082	492082	492082	492082	492082	492082	492082	492082	492082	492082	492082	492082	492082	492082	492082	492082	492082	492082	492082	492082	492082	492082	492082	492082	492082	492082	492082
	everything else (ha)	380000	361341	342683	324024	305366	286707	279684	272660	265637	280475	275312	270150	256211	242273	240291	238309	236328	225495	214663	207175	199687	192199	184448	189446	194444	199442	204440	209437	214435	219433	228814	238196	208166	178136	142002	197193	193313	189434	184002	154609	148726	142843
18a	Meat Consumption (kg/capita)	85.9884	87.7049	89.8539	88.5667	82.279	86.5049	83.1213	88.4777	88.1611	86.6045	86.6425	87.8463	87.8308	85.3294	87.5368	88.2244	89.7412	89.1465	89.2124	90.568	89.5016	89.5973	90.3868	92.8695	92.8531	94.1873	93.6671	93.1003	92.4711	94.9425	97.7937	97.4466	96.29	99.4682	98.7137	99.8968	99.5696	99.7238	99.6706	97.0952	94.628	93.899
18b	bovine, buffalo (kg/capita)	38.7138	39.4077	39.1019	39.5646	37.209	39.7314	41.5542	44.1842	42.9682	40.6219	36.1188	35.3504	35.7345	35.6198	36.3663	36.3151	36.6953	36.5454	34.1276	33.5024	31.7748	31.1234	30.5704	30.3493	29.6258	30.4151	30.5694	30.9114	30.1835	30.5276	30.8495	30.9344	30.2213	30.8857	29.664	30.1357	29.859	29.9872	29.6628	28.4885	27.7583	27.1055
18c	lamb (kg/capita)	1.38632	1.30489	1.27737	1.33393	1.07382	0.92186	0.816665	0.736382	0.67884	0.622919	0.597144	0.617507	0.635962	0.667932	0.667916	0.679291	0.654723	0.630867	0.598912	0.635432	0.629175	0.639512	0.632372	0.608154	0.590993	0.529507	0.522343	0.497012	0.49092	0.524673	0.516637	0.507284	0.519198	0.533776	0.508864	0.511649	0.48218	0.478414	0.514265	0.453753	0.44334	0.413621
18d	non-bovine (kg/capita)	45.8883	46.9923	49.4746	47.6681	43.9962	45.8516	40.7504	43.5571	44.5141	45.3596	49.9266	51.8784	51.4603	49.0417	50.5026	51.2301	52.3911	51.9702	54.4859	56.4301	57.0976	57.8345	59.1841	61.912	62.6363	63.2428	62.5753	61.6919	61.7967	63.8902	66.4276	66.0049	65.5495	68.0487	68.5408	69.2495	69.2285	69.2582	69.4936	68.1529	66.4263	66.3799
19	fluid milk (kg/capita)	124.13	124.866	125.053	124.124	122.036	118.136	118.56	118.011	116.818	115.174	113.659	111.364	109.628	106.861	107.003	107.76	109.231	109.004	107.634	107.557	107.47	105.823	105.053	103.734	101.458	100.93	100.127	99.7001	98.1794	96.7717	96.6811	95.2977	94.1835	93.8206	94.2834	93.8094	93.41	94.0983	93.5663	92.5848	93.165	92.3758
20	cheese (kg/capita)	4.92138	5.15638	5.45637	5.89747	6.11971	6.53492	6.47501	7.03788	7.25373	7.63706	7.78468	7.9494	8.24393	9.02787	9.32975	9.74175	10.2255	10.4853	10.9314	10.7551	10.7909	11.1793	11.3253	11.7087	11.8067	12.0431	12.2078	12.3866	12.4853	12.589	13.1317	13.5164	13.6379	13.8419	13.8886	14.1904	14.7618	14.815	15.2523	15.0222	15.0929	15.0619
21	butter (kg/capita)	2.55804	2.44657	2.34156	2.24748	2.15763	2.0468	2.14427	1.9568	1.9482	1.97591	2.03795	2.02669	1.92309	1.97428	2.22603	2.25769	2.42603	2.2682	2.13188	2.08309	2.14686	1.79532	2.05009	2.12821	2.16755	2.20373	2.11043	1.90515	1.83613	1.97522	2.11026	2.02876	2.00505	1.99216	2.01493	2.0398	2.06504	2.13406	2.14928	2.24988	2.25163	2.20704
50	eggs (number/capita)	302.847	302.2	303.304	296.661	282.445	277.25	270.449	264.506	261.87	266.383	271.384	266.173	259.664	259.454	255.72	255.693	250.906	249.375	249.717	242.681	233.382	230.61	229.388	230.139	230.156	231.525	228.786	229.931	230.787	235.634	246.003	247.281	248.684	250.871	250.834	252.913	251.975	254.344	246.355	242.917	242.892	242.149
18e	fish (kg/capita)	5.06909	5.32671	5.21173	5.66624	5.77937	5.4744	5.5047	5.83335	5.73378	6.06462	5.88922	5.63092	5.70625	5.62234	6.03417	6.39853	6.80772	6.99471	7.30258	6.8681	7.0549	6.77854	6.6994	6.62484	6.70485	6.78575	6.69098	6.5684	6.46371	6.57436	6.73499	6.8926	6.67252	7.08481	7.40704	7.50261	7.32643	7.49121	7.37755	7.23403	7.15269	7.15801
22a	Cereal Consumption (kg/capita)	64.7838	63.7649	62.7738	62.0994	63.8584	63.2553	64.5424	66.673	64.6324	66.2806	66.8854	67.8587	67.9466	67.7078	67.8751	69.3142	73.6643	75.8889	79.4122	82.0139	81.3408	84.218	84.5771	85.7129	87.9912	88.5421	87.78	90.9271	90.9098	89.8195	90.4781	91.8851	89.9929	88.7152	89.6851	88.9145	88.8848	89.8831	91.2114	90.8159	89.9076	90.0358
22b	cereals (kg/capita)	8.24332	8.44702	7.94502	7.88049	8.2456	8.31185	7.72364	7.69535	6.73656	8.39372	8.31394	8.99922	9.37318	8.45057	7.8384	8.03875	9.35105	10.1207	10.694	12.4598	12.8837	13.0274	13.1751	13.0605	13.0303	12.8125	12.9976	12.7803	12.3159	12.6192	12.5671	12.6326	12.862	13.2053	13.9267	13.8784	13.7379	13.8551	13.865	13.9459	13.9075	13.9303
22c	wheat (kg/capita)	51.0066	50.283	50.1114	49.8191	51.1676	50.3168	51.92	53.9881	52.362	52.2623	52.7655	53.0081	52.5406	52.9977	53.3689	54.018	56.5114	56.9685	58.8752	59.7111	58.5688	61.4923	61.548	62.6182	64.4766	64.8385	63.4879	66.3987	66.5736	64.8625	65.3011	66.3704	63.9768	62.0383	62.0146	61.0201	60.9041	61.5584	62.6499	61.9015	61.0315	61.0916
23	maize (kg/capita)	5.53383	5.03488	4.71737	4.39985	4.44521	4.62665	4.8988	4.98952	5.53383	5.62455	5.80599	5.85135	6.03279	6.25958	6.66782	7.25749	7.8018	8.7997	9.84297	9.84297	9.88833	9.6984	9.85392	10.0343	10.4844	10.8911	11.2945	11.7481	12.0202	12.3377	12.6099	12.882	13.1542	13.4717	13.7439	14.016	14.2428	14.4696	14.6964	14.9686	14.9686	15.0139
24a	Fruit & Vegetable Consumption (kg/capita)	3.12132	258.944	262.401	256.684	257.179	256.87	266.334	273.622	277.387	267.735	266.154	271.917	268.707	270.734	279.205	281.344	284.156	288.255	295.796	290.094	300.093	292.499	301.328	301.288	314.176	316.207	310.777	321.262	322.09	322.068	321.025	320.928	313.586	311.075	316.683	317.023	308.964	303.501	301.064	292.786	291.055	294.595
24b	vegetables (kg/capita)		111.753	115.046	113.812	113.355	114.767	114.333	119.339	117.374	114.635	116.7	115.992	115.06	115.575	115.63	123.725	124.676	123.835	128.692	128.216	134.905	138.717	140.187	140.453	145.249	147.431	145.412	148.753	150.608	149.589	149.897	150.613	146.319	148.096	149.946	151.881	150.365	146.237	147.26	142.389	143.22	144.151
24c	fruit (kg/capita)		107.725	109.954	104.879	106.694	106.598	114.157	116.768	122.414	117.568	113.448	120.184	118.505	119.249	126.806	120.834	122.417	126.156	129.474	123.909	126.827	116.503	120.823	121.435	128.09	127.642	124.152	130.072	130.832	132.154	130.252	129.706	126.995	124.634	126.771	126.116	122.325	121.816	118.524	116.377	114.943	117.142
25	roots and tubers (kg/capita)		35.9967	34.0006	34.9093	33.5615	32.6729	34.5771	34.3643	34.5446	32.9243	33.3916	33.2993	32.4189	32.3662	33.7132	34.112	33.6735	34.9857	34.8803	34.5497	35.5931	34.0188	36.7304	35.5928	37.2946	37.411	37.3843	38.8019	36.9127	36.7009	37.0895	36.7923	36.79	34.9469	36.6191	36.0191	33.1606	31.9603	32.0628	30.9453	29.7963	29.2755
26	pulses (kg/capita)	3.12132	3.46927	3.40038	3.08414	3.56898	2.83232	3.26703	3.15152	3.05525	2.60828	2.61477	2.44141	2.72316	3.54462	3.05611	2.67252	3.38931	3.279	2.74993	3.41989	2.7679	3.2604	3.58684	3.8073	3.54259	3.72319	3.82872	3.63511	3.73676	3.62435	3.7863	3.81634	3.48186	3.398	3.34699	3.0075	3.11321	3.48772	3.21712	3.07477	3.09616	4.02645
27a	coffee and tea (kg/capita)	6.70507	6.51238	6.29951	6.55226	6.46433	6.16162	5.87644	6.05387	4.60721	5.13332	5.47806	5.01146	4.88178	4.8331	4.89781	4.98409	5.0958	5.10796	4.97256	4.78837	4.90062	5.01712	5.0315	4.90792	4.48806	4.06517	3.95639	4.32073	4.4804	4.62884	4.8527	5.03187	4.68223	4.56521	4.65971	4.75206	4.67861	4.72667	4.75275	4.72769	4.56786	4.53379
27b	cocoa (kg/capita)	1.75012	1.76303	1.77365	1.97303	1.86866	1.65865	1.46386	1.68926	1.49729	1.51819	1.50959	1.52774	1.62529	1.69178	1.80425	1.94028	2.10566	2.16382	2.17922	2.15607	2.24512	2.4483	2.59228	2.57575	2.42525	2.16595	2.04201	2.36987	2.25976	2.44307	2.54172	2.68323	2.52764	2.1848	2.40096	2.72067	2.94779	2.91902	2.69891	2.53171	2.50995	2.49123
footnotes
2	US Bureau of the Census, Puerto Rico Census of Population, Years: 1960 and 1970; and Puerto Rico Planning Board, Economic and Social Planning Program, Office of the Census; US Bureau of the Census, Puerto Rico Census of Population, Years: 1970 and 1980; and Puerto Rico Planning Board, Economic and Social Planning Program, Office of the Census; US Bureau of the Census, Puerto Rico Census of Popula…				linear interpolation between decadal census
	EPA_Intercensal_Estimates_PR_1960_1999.xls; census 2000 - 2008.xls; ST-EST00INT-01 intercensal data 2000-2010.xlsx
14a	http://www.eia.gov/cfapps/ipdbproject/IEDIndex3.cfm
	Fossil Fuels 1980-2009.xls; assume all produced was consumed; coal interpolated using 1983-2002 data (did not include post-2002 due to large increase).
14b	http://www.eia.gov/cfapps/ipdbproject/IEDIndex3.cfm
	Fossil Fuels 1980-2009.xls; assume all produced was consumed
14c	http://www.eia.gov/cfapps/ipdbproject/IEDIndex3.cfm
	Fossil Fuels 1980-2009.xls; assume all produced was consumed; reported in thousand barrels per day. Multiplied by 365 to get yearly value.
14d	http://www.eia.gov/cfapps/ipdbproject/IEDIndex3.cfm
	Fossil Fuels 1980-2009.xls; assume all produced was consumed
14e	http://www.eia.gov/cfapps/ipdbproject/IEDIndex3.cfm
	Fossil Fuels 1980-2009.xls; assume all produced was consumed
14f	http://www.eia.gov/cfapps/ipdbproject/IEDIndex3.cfm
	Fossil Fuels 1980-2009.xls; assume all produced was consumed
15	http://www.census.gov/prod/cen2000/phc-1-53-ENG.pdf
	constant - US Census Bureau, 3424.56 mi^2 * 258.999 = ha; 2000 census places.xlsx
16	population divided by land area
17	Census of Agriculture (1974, 1978, 1982, 1987, 1998, 2002, 2007; L:\Priv\Cin\NRMRL\MHopton\Research\Sustainability metrics\Puerto Rico\data\Agricultural)				Pares-Ramos 2008; agricultural land increased from 6% in 1940 to 40% in 2000. Arable land <2002 is "cropland harvested" >2001 is "harvested cropland"
	census of agrigulture 1974.pdf, census of agrigulture 1978.pdf, census of agrigulture 1982.pdf, census of agrigulture 1987.pdf, census of agrigulture 1992.pdf, census of agrigulture 1997 fish.pdf, census of agrigulture 1997 land and crops.pdf, census of agrigulture 1997 land.pdf, census of agrigulture 1997 livestock.pdf, census of agrigulture 2002.pdf, census of agrigulture 2007.pdf
47	Census of Agriculture (1974, 1978, 1982, 1987, 1998, 2002, 2007; L:\Priv\Cin\NRMRL\MHopton\Research\Sustainability metrics\Puerto Rico\data\Agricultural)				Pasture <2002 "cropland in cultivated and improved pasture" >2001 "cropland used only for pasture or grazing"
	census of agrigulture 1974.pdf, census of agrigulture 1978.pdf, census of agrigulture 1982.pdf, census of agrigulture 1987.pdf, census of agrigulture 1992.pdf, census of agrigulture 1997 fish.pdf, census of agrigulture 1997 land and crops.pdf, census of agrigulture 1997 land.pdf, census of agrigulture 1997 livestock.pdf, census of agrigulture 2002.pdf, census of agrigulture 2007.pdf
48	Kennaway and Helmer (2007); Birdsey and Weaver (1987); Brandeis et al. (2003)				interpolate missing years
49	http://www.census.gov/prod/cen2000/phc-1-53-ENG.pdf
	constant - US Census Bureau, 1899.94 mi^2 * 258.999 = ha; 2000 census places.xlsx; phc-3-53-eng2000.pdf; Water area is the sum of the surfaces of all inland water bodies, such as lakes, reservoirs, or rivers, as delimited by international boundaries and/or coastlines.
50	1991 - Pares-Ramos et al 2008, 10.5%; 2000 - Pares-Ramos et al 2008; 11% census bureau, census designated place says 111709 ha or 431.31 mi^2; 2003 - Martinuzzi et al 2007; 2006 - calculated from GAP layer (urban and barren), but GAP metadata indicate 101844 ha "urban and barren"; 2010 - US Census Bureau, Census Designated Places; missing values linearly interpolated
18a	USDA/Economic Research Service. Last updated 25 Jan 2013 http://www.ers.usda.gov/data-products/food-availability-(per-capita)-data-system.aspx
	Hopton.MeatPoultryFish.xls
18b	USDA/Economic Research Service. Last updated 25 Jan 2013 http://www.ers.usda.gov/data-products/food-availability-(per-capita)-data-system.aspx
	beef and veal; Hopton.MeatPoultryFish.xls
18c	USDA/Economic Research Service. Last updated 25 Jan 2013 http://www.ers.usda.gov/data-products/food-availability-(per-capita)-data-system.aspx
	Hopton.MeatPoultryFish.xls
18d	USDA/Economic Research Service. Last updated 25 Jan 2013 http://www.ers.usda.gov/data-products/food-availability-(per-capita)-data-system.aspx
	chicken, pork, turkey; Hopton.MeatPoultryFish.xls
18e	USDA/Economic Research Service. Last updated 25 Jan 2013 http://www.ers.usda.gov/data-products/food-availability-(per-capita)-data-system.aspx
	Hopton.MeatPoultryFish.xls; fish and shellfish
19	USDA/Economic Research Service. Last updated 25 Jan 2013 http://www.ers.usda.gov/data-products/food-availability-(per-capita)-data-system.aspx
	Hopton.Dairy.xls
20	USDA/Economic Research Service. Last updated 25 Jan 2013 http://www.ers.usda.gov/data-products/food-availability-(per-capita)-data-system.aspx
	Hopton.Dairy.xls
21	USDA/Economic Research Service. Last updated 25 Jan 2013 http://www.ers.usda.gov/data-products/food-availability-(per-capita)-data-system.aspx
	Hopton.Dairy.xls Hopton.Fats.xls
50	USDA/Economic Research Service. Last updated 25 Jan 2013 http://www.ers.usda.gov/data-products/food-availability-(per-capita)-data-system.aspx
	Hopton.Eggs.xls
22a	USDA/Economic Research Service. Last updated 25 Jan 2013 http://www.ers.usda.gov/data-products/food-availability-(per-capita)-data-system.aspx
	Hopton.Grains.xls
22b	USDA/Economic Research Service. Last updated 25 Jan 2013 http://www.ers.usda.gov/data-products/food-availability-(per-capita)-data-system.aspx
	Hopton.Grains.xls; Barley, oats, rice, rye - grain equivalents
22c	USDA/Economic Research Service. Last updated 25 Jan 2013 http://www.ers.usda.gov/data-products/food-availability-(per-capita)-data-system.aspx
	Hopton.Grains.xls; wheat flour and durum - total
23	USDA/Economic Research Service. Last updated 25 Jan 2013 http://www.ers.usda.gov/data-products/food-availability-(per-capita)-data-system.aspx
	Hopton.Vegetables.xls; corn - total
24a	USDA/Economic Research Service. Last updated 25 Jan 2013 http://www.ers.usda.gov/data-products/food-availability-(per-capita)-data-system.aspx
	Hopton.FruitsVegetables.xls Hopton.Vegetables.xls
24b	USDA/Economic Research Service. Last updated 25 Jan 2013 http://www.ers.usda.gov/data-products/food-availability-(per-capita)-data-system.aspx
	Fruits and Vegetables Consumption.xls; vegetables - total vegetables (minus potatoes for chips and legumes)
24c	USDA/Economic Research Service. Last updated 25 Jan 2013 http://www.ers.usda.gov/data-products/food-availability-(per-capita)-data-system.aspx
	Hopton.Fruits.xls; fruit - total fruit
25	USDA/Economic Research Service. Last updated 25 Jan 2013 http://www.ers.usda.gov/data-products/food-availability-(per-capita)-data-system.aspx
	Hopton.Potatoes.xls; potatoes - retail
26	USDA/Economic Research Service. Last updated 25 Jan 2013 http://www.ers.usda.gov/data-products/food-availability-(per-capita)-data-system.aspx
	Hopton.Legumes.xls; legumes - total
27a	USDA/Economic Research Service. Last updated 25 Jan 2013 http://www.ers.usda.gov/data-products/food-availability-(per-capita)-data-system.aspx
	Hopton.CoffeeTea.xls; coffee - bean equivalent, tea - dry leaf equivalent
27b	USDA/Economic Research Service. Last updated 25 Jan 2013 http://www.ers.usda.gov/data-products/food-availability-(per-capita)-data-system.aspx
	Hopton.CoffeeTea.xls; cocoa - bean equivalent
41	estimated value - total land in farms minus pastureland; Agricultural Statistics = arable land http://www.agcensus.usda.gov/ 1982, 1987, 1992, 1997, 2002, 2007
42	values reported as "D" in report are listed as values from adjacent survey
	1980 data from 1978 report
43	based on Wackernagel and Rees, 1996 value for 1993
44	Source: U.S. Department of Agriculture, Natural Resources and Conservation Service, National Resources Inventory 2001 Annual NRI, Urbanization and Development of Rural Land, July 2003. See also <http://www.nrcs.usda.gov/technical/land/nri01/urban.pdf> (released July 2003).
45	total-(built land+forest+pasture+arable)
46	USDA FS for years 1987, 1997, 2002
